## **Synonymous mutations and the molecular evolution of SARS-Cov-2 origins**

Hongru Wang<sup>1</sup>, Lenore Pipes<sup>1</sup> and Rasmus Nielsen<sup>1, 2, 3\*</sup>

<sup>1</sup> Department of Integrative Biology, UC Berkeley, Berkeley, CA 94707, USA.

<sup>2</sup>Department of Statistics, UC Berkeley, Berkeley, CA 94707, USA.

<sup>3</sup>Globe Institute, University of Copenhagen, 1350 København K, Denmark.

\*Address: 4098 Valley Life Sciences Building, Department of Integrative Biology, UC Berkeley. Berkeley, CA 94707. [rasmus\\_nielsen@berkeley.edu](mailto:rasmus_nielsen@berkeley.edu)

## 1 **Abstract**

2 Human severe acute respiratory syndrome coronavirus 2 (SARS-CoV-2) is most closely  
3 related, by average genetic distance, to two coronaviruses isolated from bats, RaTG13 and  
4 RmYN02. However, there is a segment of high amino acid similarity between human SARS-  
5 CoV-2 and a pangolin isolated strain, GD410721, in the receptor binding domain (RBD) of  
6 the spike protein, a pattern that can be caused by either recombination or by convergent  
7 amino acid evolution driven by natural selection. We perform a detailed analysis of the  
8 synonymous divergence, which is less likely to be affected by selection than amino acid  
9 divergence, between human SARS-CoV-2 and related strains. We show that the  
10 synonymous divergence between the bat derived viruses and SARS-CoV-2 is larger than  
11 between GD410721 and SARS-CoV-2 in the RBD, providing strong additional support for  
12 the recombination hypothesis. However, the synonymous divergence between pangolin  
13 strain and SARS-CoV-2 is also relatively high, which is not consistent with a recent  
14 recombination between them, instead it suggests a recombination into RaTG13. We also  
15 find a 14-fold increase in the  $d_N/d_S$  ratio from the lineage leading to SARS-CoV-2 to the  
16 strains of the current pandemic, suggesting that the vast majority of non-synonymous  
17 mutations currently segregating within the human strains have a negative impact on viral  
18 fitness. Finally, we estimate that the time to the most recent common ancestor of SARS-  
19 CoV-2 and RaTG13 or RmYN02 based on synonymous divergence, is 51.71 years (95%  
20 C.I., 28.11-75.31) and 37.02 years (95% C.I., 18.19-55.85), respectively.

21

## 22 **Introduction**

23 The Covid19 pandemic is perhaps the biggest public health and economic threat that the world  
24 has faced for decades (Li, Guan, et al. 2020; Wu, et al. 2020; Zhou, Yang, et al. 2020). It is  
25 caused by a coronavirus (Lu, et al. 2020; Zhang and Holmes 2020), Severe acute respiratory

1 syndrome coronavirus 2 (SARS-CoV-2), an RNA virus with a 29,903 bp genome consisting of  
2 four major structural genes (Wu, et al. 2020; Zhou, Yang, et al. 2020). Of particular relevance to  
3 this study is the *spike* protein which is responsible for binding to the primary receptor for the  
4 virus, angiotensin-converting enzyme 2 (*ACE2*) (Wan, et al. 2020; Wu, et al. 2020; Zhou, Yang,  
5 et al. 2020).

6 Human SARS-CoV-2 is related to a coronavirus (RaTG13) isolated from the bat  
7 *Rhinolophus affinis* from Yunnan province of China (Zhou, Yang, et al. 2020). RaTG13 and the  
8 human strain reference sequence (Genbank accession number MN996532) are 96.2% identical  
9 and it was first argued that, throughout the genome, RaTG13 is the closest relative to human  
10 SARS-CoV-2 (Zhou, Yang, et al. 2020). And RaTG13 and SARS-CoV-2 were 91.02% and  
11 90.55% identical, respectively, to coronaviruses isolated from Malayan pangolins (Pangolin-CoV)  
12 seized at the Guangdong customs of China, which therefore form a close outgroup to the  
13 SARS-CoV-2+RaTG13 clade (Zhang, et al. 2020). Furthermore, five key amino acids in the  
14 receptor-binding domain (RBD) of *spike* were identical between SARS-CoV-2 and Pangolin-  
15 CoV, but differed between those two strains and RaTG13 (Zhang, et al. 2020). Xiao et al  
16 assembled and analysed a full-length Pangolin-CoV genome sequence, showing that the  
17 receptor-binding domain of its S protein differs from the SARS-CoV-2 by only one noncritical  
18 amino acid (Xiao, et al. 2020). Similar observations were made using Pangolin-CoV strains  
19 found in Malayan pangolin samples seized by the Guangxi customs of China (Lam, et al. 2020).  
20 Additionally, it is shown that when analyzing a window of length 582bp in the RBD,  
21 nonsynonymous mutations support a phylogenetic tree with SARS-CoV-2 and Pangolin-CoV as  
22 sister-groups, while synonymous mutations do not (Lam, et al. 2020). They discuss two possible  
23 explanations for their results, one which includes recombination and another which includes  
24 selection-driven convergent evolution. Independent analysis also support SARS-CoV-2 obtains  
25 the receptor binding motif through recombination from a donor related to this Pangolin-CoV  
26 strain (Li, Giorgi, et al. 2020). Detailed phylogenetic analysis on sub-regions across the S

1 protein showed that it is the RaTG13 sequence that show exceptionally divergent pattern in the  
2 RBD region, they instead argued a recombination occurred into RaTG13 from an unknown  
3 divergent source (Boni, et al. 2020). This would explain the amino acid similarity between  
4 SARS-CoV-2 and Pangolin-CoV in the RBD as an ancestral trait that has been lost (by  
5 recombination) in RaTG13. Using a phylogenetic analysis they also dated the RaTG13 and  
6 SARS-CoV-2 divergence to be between 40 to 70 years. Recently, Zhou et al. discovered a viral  
7 strain, RmYN02 from the bat *Rhinolophus malayanus*, with a reported 97.2% identity in the  
8 ORF1ab gene but with only 61.3% sequence similarity to SARS-CoV-2 in the RBD (Zhou, Chen,  
9 et al. 2020). Moreover, the RmYN02 strain also harbors multiple amino acid insertions at the  
10 S1/S2 cleavage site in the spike protein (Zhou, Chen, et al. 2020).

11 To analyze the history of these sequences further, we here focus on patterns of  
12 synonymous divergence, which has received less focus, but also is less likely to be affected by  
13 selection than amino acid divergence. We develop a bias corrected estimator of synonymous  
14 divergence specific for SARS-CoV-2 and related strains, and analyze divergence using both  
15 sliding windows and a whole-genome approach between SARS-CoV-2 and related viral strains.

16

## 17 **Materials and methods**

18 *BLAST searches:* Sequences for blast databases were downloaded on March 26, 2020 from the  
19 following sources: EMBL nucleotide libraries for virus

20 (<ftp://ftp.ebi.ac.uk/pub/databases/embl/release/std>), NCBI Virus Genomes

21 (<ftp://ftp.ncbi.nlm.nih.gov/genomes/Viruses>), NCBI Virus Genbank Entries

22 (<ftp://ftp.ncbi.nlm.nih.gov/genomes/genbank/viral/>), NCBI Influenza Genomes

23 (<ftp://ftp.ncbi.nlm.nih.gov/genomes/INFLUENZA/>), all Whole Genome Shotgun

24 (<https://www.ncbi.nlm.nih.gov/genbank/wgs/>) assemblies under taxonomy ID 10239, along with

25 GISAID Epiflu and EpiCoV databases. Recently published sequences from the Myanmar bat

26 samples (Valitutto, et al. 2020) were also added to the database. Blast databases were created

1 using the default parameters for makeblastdb. Blast searches were performed using blastn  
2 (Altschul, et al. 1990) with parameters “-word\_size 7 -reward 1 -penalty -3” and all other  
3 parameters as the default settings. All the blast hits to different Guangdong pangolin viral strain  
4 sequences were merged as one hit, and the blast hits to different Guangxi pangolin viral strain  
5 sequences were also merged.

6  
7 *Alignment:* To obtain an in-frame alignment of the genomes, we first identified the coding  
8 sequences of each viral strain using independent pairwise alignments with the coding  
9 sequences of the SARS-CoV-2 (Wuhan-Hu-1) genome. The genome alignments were  
10 performed using MAFFT (v7.450) (Kato and Standley 2013) with parameters “--maxiterate  
11 1000 --localpair”. The coding sequences of each gene were aligned using PRANK (Loytynoja  
12 2014) (v.170427) with parameters “-codon -F”. Finally, the alignments for all genes were  
13 concatenated following their genomic order. ORF1a was excluded since its sequence is a  
14 subset of ORF1ab.

15  
16 *Recombination detection:* We detected possible recombination events across the genome using  
17 a combination of 7 algorithms, RDP (Martin and Rybicki 2000), GENECONV (Padidam, et al.  
18 1999), Bootscan (Salminen, et al. 1995), Maxchi (Smith 1992), Chimaera (Posada and Crandall  
19 2001), SiSscan (Gibbs, et al. 2000), and 3Seq (Boni, et al. 2007) implemented in RDP5  
20 program (Martin, et al. 2015) (version Beta 5.5) and then considered the recombination signals  
21 that were supported by at least two methods. We note that these 7 methods are all based on  
22 inferring recombination using the same type of evidence, and concordance between the  
23 methods cannot be interpreted as validation of the recombination signal. However, we will also  
24 use phylogenetic methods and methods based on relative sequence divergence to further  
25 investigate the putative recombination signals. The analysis was performed on the multiple  
26 sequence alignment consisting of the five viral strains. All regions showing recombination

1 signals (Supplementary Table 5) were removed in subsequent analyses from all strains when  
2 stating that recombination regions were removed.

3

4 *Tree estimation:* We estimated phylogenetic trees using two methods: Neighbor Joining (NJ)  
5 and Maximum Likelihood (ML). The NJ trees were estimated using  $d_N$  or  $d_S$  distance matrices  
6 which estimated using codeml (Yang 2007) with parameters " runmode= -2, CodonFreq = 2,  
7 cleandata = 1". To obtain bootstrap values, we bootstrapped the multiple sequence alignments  
8 1,000 times, repeating the inference procedure for each bootstrap sample. The NJ tree was  
9 estimated using the 'neighbor' software from the PHYLIP package (Felsenstein 2009). For ML  
10 trees, we used IQ-TREE (Nguyen, et al. 2015) (v1.5.2) with parameter "-TEST -alrt 1000" which  
11 did substitution model selection for the alignments and performed maximum-likelihood tree  
12 estimation with the selected substitution model for 1,000 bootstrap replicates. For this analysis,  
13 we masked all regions (Supplementary Table 5) that show recombination signals in any of the  
14 five studied viral genome. We masked regions from all sequences when at least one sequence  
15 showed evidence for recombination in that region. All masked regions are listed in  
16 Supplementary Table 5. The coordinates (based on the Wuhan-Hu-1 genome) of the three  
17 recombination regions (merged set of all the regions in Supplementary Table 5) were: 14611-  
18 15225, 21225-24252 and 25965-28297. We also estimate genome-wide divergence between  
19 RaTG13 and Wuhan-Hu-1 only excluding the region (position 22853-23092) where potential  
20 recombination was detected for the Wuhan-Hu-1 strain (Supplementary Table 5).

21

22 *Simulations:* We simulated divergence with realistic parameters for SARS-CoV-2 using a  
23 continuous time Markov chain under the F3x4 codon-based model (Goldman and Yang 1994;  
24 Muse and Gaut 1994) (Yang, et al. 2000), which predicts codon frequencies from the empirical  
25 nucleotide frequencies in all 3 codon positions and using the global genomic maximum  
26 likelihood estimates of the transition/transversion bias  $\kappa$  ( $\approx 2.9024$ ) and the  $d_N/d_S$  ratio  $\omega$

1 (=0.0392) estimated from the human SARS-CoV-2 comparison to the nearest outgroup  
2 sequence, RaTG13 (see Results). For the simulations of short 300 bp sequences we kept  $\omega$   
3 constant but varied time such that the number of synonymous substitutions per synonymous  
4 sites,  $d_S$ , varied between 0.25 and 3.00. Estimates of  $d_S > 3$  are truncated to 3. For simulations  
5 of genome-wide divergence between RaTG13 and human strains, we fix  $d_S$  at 0.1609 (the  
6 maximum likelihood estimate outside the RBD region reported in the Results section). In all  
7 cases, we use 10,000 independent replicate simulations for each parameter setting.

8

9 *Estimation of sequence divergence in 300-bp windows:*  $d_N$  and  $d_S$  were estimated using two  
10 different methods implemented in the PAML package (Yang 2007) (version 4.9d): a count-  
11 based method, YN00 (Yang and Nielsen 2000) as implemented in the program 'yn00' with  
12 parameters "icode = 0, weighting = 0, commonf3x4 = 0", and a maximum-likelihood method  
13 (Goldman and Yang 1994; Muse and Gaut 1994) implemented in codeml applied with  
14 arguments "runmode= -2, CodonFreq = 2". The estimates in 300-bp windows were further bias-  
15 corrected as described below.

16

17 *Bias correction for  $d_S$  estimates in 300-bp window:* To correct for the biases observed in the  
18 estimation of  $d_S$  (see results section) we identified a quartic function which maps from  $\hat{d}_S$ , the  
19 estimates of  $d_S$ , into  $\hat{d}_S^*$ , the bias corrected estimate such that to a close approximation,  $E[\hat{d}_S^*]$   
20 =  $d_S$ . To identify the coefficients of this function we used 10,000 simulations as previously  
21 described, on a grid of  $d_S$  values (0.25, 0.5, 0.75, ..., 3.0). We then identified coefficients such  
22 that sum of  $(E[\hat{d}_S^*] - d_S)^2$  is minimized over all simulation values.

23

## 24 **Results**

25 *Database searches*

1 The genome of human coronavirus can effectively recombine with other viruses to form a  
2 chimeric new strain when they co-infect the same host (Forni, et al. 2017; Boni, et al. 2020).  
3 Complicated recombination histories have been observed in the receptor binding motif region of  
4 the spike protein (Lam, et al. 2020; Xiao, et al. 2020; Zhang, et al. 2020) and several other  
5 regions (Boni, et al. 2020) of the SARS-CoV-2, it is thus important to exhaustively search along  
6 the viral genome for other regions potentially of recombination origin and identify possible  
7 donors associated with them. To identify possible viral strains that may have contributed, by  
8 recombination, to the formation of human SARS-CoV-2, we searched NCBI and EMBL virus  
9 entries along with GISAID EpiFlu and EpiCov databases for similar sequences using BLAST in  
10 100bp windows stepping every 10bp (Fig. 1b). The majority of the genome (78.1%, 2330/2982  
11 of the windows) has one unique best hit, likely reflecting the high genetic diversity of the  
12 coronavirus. 21.9% of the genomic regions has multiple best hits, which suggests that these  
13 regions might be more conserved. Among the windows with unique best hits, 97.0% (2260/2330)  
14 of them were the RaTG13 or RmYN02 bat strains and 1.9% of them, including the *ACE2*  
15 contact residues region of the S protein, were the pangolin SARS-CoV-2 virus. These  
16 observations are consistent with previous results that RaTG13 and RmYN02 are the most  
17 closely related viral strains, while the region containing the *ACE2* contact residues is more  
18 closely related to the pangolin virus strain (Lam, et al. 2020; Li, Giorgi, et al. 2020; Xiao, et al.  
19 2020; Zhang, et al. 2020). A considerable amount of genomic regions (20 windows with unique  
20 hits) show highest sequence identity with other coronaviruses of the SARS-CoV-2 related  
21 lineage (Lam, et al. 2020) (bat-SL-CoVZC45 and bat-SL-CoVZXC21 (Hu, et al. 2018)). In  
22 addition, there were 6 windows whose unique top hits are coronavirus of a SARS-CoV related  
23 lineage (Lam, et al. 2020) (Supplementary Table 4). The mosaic pattern that different regions of  
24 the genome show highest identity to different virus strains is likely to have been caused by the  
25 rich recombination history of the SARS-CoV-2 lineage (Boni, et al. 2020; Li, Giorgi, et al. 2020;  
26 Patiño-Galindo, et al. 2020). Moreover, its unique connection with SARS-CoV related lineages



1 in some genomic regions may suggest recombination between the ancestral lineage of SARS-  
2 CoV-2 and distantly related virus lineages, although more formal analyses are needed to  
3 determine the recombination history (see also Boni, et al. 2020 for further discussion).  
4 Searching databases with BLAST using the most closely related viral strains, RaTG13 and  
5 RmYN02, we observe a very similar pattern, as that observed for SARS-CoV-2, in terms of top  
6 hits across the genome (Fig. 1b), suggesting that these possible recombination events with  
7 distantly related lineages are not unique to the SARS-CoV-2 lineage, but happened on the  
8 ancestral lineage of SARS-CoV-2, RaTG13, and RmYN02. A notable exception is a large region  
9 around the *S* gene, where RmYN02 show little similarity to both SARS-CoV-2 and RaTG13.

10

#### 11 *Sequence similarity and recombination*

12 We focus further on studying the synonymous evolution of SARS-CoV-2, and analyzing Wuhan-  
13 Hu-1 as the human nCoV19 reference strain (Wu, et al. 2020) along with the four viral strains  
14 with highest overall identity: the bat strains RmYN02 and RaTG13 (Zhou, Chen, et al. 2020;  
15 Zhou, Yang, et al. 2020), and the Malayan pangolin strains, GD410721 and GX\_P1E, which  
16 were isolated from Malayan pangolin samples seized by Guangdong and Guangxi Customs of  
17 China, respectively. These four strains have previously been identified as the strains most  
18 closely related to SARS-CoV-2 (Lam, et al. 2020; Xiao, et al. 2020). Other available  
19 phylogenetically related, but less similar viral strains, such as bat-SL-CoVZXC21 and bat-SL-  
20 CoVZC45 (Hu, et al. 2018), are not included due to nearly saturated synonymous mutations  
21 when compared with SARS-CoV-2 (maximum likelihood estimates of  $d_S = 3.2067$  and  $2.8445$ ,  
22 respectively).

23 We performed recombination analyses across the five viral genomes based on the  
24 consensus of the seven recombination-detection methods implemented in RDP5 (see Methods).  
25 We identified nine recombination regions affecting at least one of the sequences  
26 (Supplementary Table 5). Phylogenetic analyses of these regions confirm phylogenetic

1 incongruence when compared with genome-wide trees (Fig. 2 and Supplementary Figure 1-3).  
2 Particularly, a recombination signal is found in a region encompassing the RBD of the S protein,  
3 suggesting that the human SARS-CoV-2 (Wuhan-Hu-1) sequence is a recombinant with the  
4 Pangolin-CoV (GD410721) as the donor (Supplementary Table 5). Phylogenetic analyses also  
5 support that Wuhan-Hu-1 and GD410721 form a clade relative to RaTG13 (Supplementary  
6 Figure 1c, 1d). Phylogenetic analyses (Fig. 2) in genomic regions with all recombination tracts  
7 (Supplementary Table 5) masked using Maximum-likelihood (Fig. 2a) and Neighbor-joining  
8 based on synonymous (Fig. 2b) or non-synonymous (Fig. 2c) mutation distance metrics,  
9 consistently support RmYN02 as the nearest outgroup to human SARS-CoV-2, in contrast to  
10 previous analyses before the discovery of RmYN02, which instead found RaTG13 to be the  
11 nearest outgroup (Lam, et al. 2020; Wu, et al. 2020). This observation is also consistent with the  
12 genome-wide phylogeny constructed in previous study (Zhou, Chen, et al. 2020).

13 We plot the overall sequence similarity (% nucleotides identical) between SARS-CoV-2  
14 and the four other strains analyzed in windows of 300 bp (Fig. 1). Notice that the divergences  
15 between human SARS-CoV-2 and the bat viral sequences, RaTG13 and RmYN02, in most  
16 regions of the genome, are quite low compared to the other comparisons. A notable exception is  
17 the suspected recombination region in RmYN02 that has an unusual high level of divergence  
18 with all other viruses (Fig. 1e). However, there is also another exception: a narrow window in the  
19 RBD of the S gene where the divergence between SARS-CoV-2 and GD410721 is moderate  
20 and the divergences between GD410721 and both SARS-CoV-2 and RaTG13 are quite high  
21 and show very similar pattern. This, as also found in the recombination analyses based on  
22 methods implemented in RDP5, would suggest a recombination event from a strain related to  
23 GD410721 into an ancestor of the human strain (Lam, et al. 2020; Xiao, et al. 2020; Zhang, et al.  
24 2020), or alternatively, from some other species into RaTG13, as previously hypothesized (Boni,  
25 et al. 2020). We note that RmYN02 is not informative about the nature of this event as it harbors  
26 a long and divergent haplotype in this region, possibly associated with another independent

1 recombination event with more distantly related viral strains (Fig. 1e). The other four sequences  
2 are all highly, and approximately equally, divergent from RmYN02 in this large region (Fig. 1e),  
3 suggesting that the RmYN02 strain obtained a divergent haplotype from the recombination  
4 event. When BLAST searching using 100-bp windows along the RmYN02 genome, we find no  
5 single viral genome as the top hit, instead the top hits are found sporadically in different viral  
6 strains of the SARS-CoV lineage (Fig. 1f), suggesting that the sequence of the most proximal  
7 donor is not represented in the database.

8

### 9 *Estimating synonymous divergence and bias correction*

10 While the overall divergence in the S gene encoding the *spike* protein could suggest the  
11 presence of recombination in the region, previous study (Lam, et al. 2020) reported that the tree  
12 based on synonymous substitutions supported RaTG13 as the sister taxon to the human SARS-  
13 CoV-2 also in this region. That would suggest the similarity between GD410721 and human  
14 SARS-CoV-2 might be a consequence of convergent evolution, possibly because both strains  
15 adapted to the use of the same receptor. An objective of the current study is to examine if there  
16 are more narrow regions of the spike protein that might show evidence of recombination. We  
17 investigate this issue using estimates of synonymous divergence per synonymous site ( $d_S$ ) in  
18 sliding windows of 300 bp. However, estimation of  $d_S$  is complicated by the high levels of  
19 divergence and extremely skewed nucleotide content in the 3rd position of the sequences  
20 (Table 1) which will cause a high degree of homoplasy. We, therefore, entertain methods for  
21 estimation that explicitly account for unequal nucleotide content and multiple hits in the same  
22 site such as maximum likelihood methods and the YN00 method (Yang and Nielsen 2000). It is  
23 shown that for short sequences, some counting methods, such as the YN00 method, can  
24 perform better in terms of Mean Squared Error (MSE) for estimating  $d_N$  and  $d_S$  (Yang and  
25 Nielsen 2000). However, it is unclear in the current case how best to estimate  $d_S$ . For this  
26 reason, we performed a small simulations study (see Methods) for evaluating the performance

1 of the maximum likelihood (ML) estimator of  $d_N$  and  $d_S$  (as implemented in codeml (Yang 2007))  
2 under the F3x4 model and the YN00 method implemented in PAML. In general, we find that  
3 estimates under the YN00 are more biased with slightly higher MSE than the ML estimate for  
4 values in the most relevant regime of  $d_S < 1.5$  (Fig. 3). However, we also notice that both  
5 estimators are biased under these conditions. For this reason, we perform a bias correction  
6 calibrated using simulations specific to the nucleotide frequencies and  $d_N/d_S$  ratio observed for  
7 SARS-CoV-2 (see Methods). The bias corrections we obtain are  $\hat{d}_S^* = \hat{d}_S + 0.455\hat{d}_S^2 - 0.824\hat{d}_S^3$   
8  $+ 0.264\hat{d}_S^4$ , for the ML estimator and  $\hat{d}_S^* = \hat{d}_S + 1.492\hat{d}_S^2 - 3.166\hat{d}_S^3 + 1.241\hat{d}_S^4$  for yn00. Notice  
9 that there is a trade-off between mean and variance (Fig. 3) so that the MSE becomes very  
10 large, particularly for the for yn00 method, after bias correction. For  $d_S > 2$  the estimates are  
11 generally not reliable, however, we note that for  $d_S < 1.5$  the bias-corrected ML estimator tends  
12 overall to have slightly lower MSE, and we, therefore, use this estimator for analyses of 300 bp  
13 regions.

14

### 15 *Synonymous divergence*

16 We estimate  $d_N$  and  $d_S$  under the F3x4 model in codeml (Goldman and Yang 1994; Muse and  
17 Gaut 1994) and find genome-wide estimates of  $d_S = 0.1604$ ,  $d_N = 0.0065$  ( $d_N/d_S = 0.0405$ )  
18 between SARS-CoV-2 and RaTG13 and  $d_S = 0.2043$ ,  $d_N = 0.0220$  ( $d_N/d_S = 0.1077$ ) between  
19 SARS-CoV-2 and RmYN02. However, a substantial amount of this divergence might be caused  
20 by recombination with more divergent strains. We, therefore, also estimate  $d_N$  and  $d_S$  for the  
21 regions with inferred recombination tracts (Supplementary Table 5) removed from all  
22 sequences (Table 3). We then find values of  $d_S = 0.1462$  (95% C.I., 0.1340-0.1584) and  $d_S =$   
23  $0.1117$  (95% C.I., 0.1019-0.1215) between SARS-CoV-2 and RaTG13 and RmYN02,  
24 respectively. This confirms that RmYN02 is the virus most closely related to SARS-CoV-2. The  
25 relative high synonymous divergence also shows that the apparent high nucleotide similarity

1 between SARS-CoV-2 and the bat strains (96.2% (Zhou, Yang, et al. 2020) and 97.2%(Zhou,  
2 Chen, et al. 2020)) is caused by conservation at the amino acid level ( $d_N/d_S = 0.0410$  and  
3  $0.0555$ ) exacerbated by a high degree of synonymous homoplasy facilitated by a highly skewed  
4 nucleotide composition at the third position of codons (with an AT content  $>72\%$ , Table 1).

5 The synonymous divergence to the pangolin sequences GD410721 and GX\_P1E in  
6 genomic regions with inferred recombination tracts removed is  $0.5095$  (95% C.I.,  $0.4794-0.5396$ )  
7 and  $1.0304$  (95% C.I.,  $0.9669-1.0939$ ), respectively. Values for other comparisons are shown in  
8 Tables 2 and 3. In comparisons between SARS-CoV-2 and more distantly related strains,  $d_S$  will  
9 be larger than 1, and with this level of saturation, estimation of divergence is associated with  
10 high variance and may be highly dependent on the accuracy of the model assumptions. This  
11 makes phylogenetic analyses based on synonymous mutations unreliable when applied to  
12 these more divergent sequences. Nonetheless, the synonymous divergence levels seem  
13 generally quite compatible with a molecular clock with a  $d_S$  of  $0.9974$  (95% C.I.,  $0.9381-1.0567$ ,  
14 GD410721),  $1.0366$  (95% C.I.,  $0.9737-1.0995$ , RaTG13),  $1.0333$  (95% C.I.,  $0.9699-1.0967$ ,  
15 RmYN02) and  $1.0304$  (95% C.I.,  $0.9669-1.0939$ , Wuhan-Hu-1) between the outgroup, GX\_P1E ,  
16 and the three ingroup strains. The largest value is observed for RaTG13 ( $d_S = 1.0366$ ), despite  
17 this sequence being the most early sampled sequence, perhaps caused by additional  
18 undetected recombination into RaTG13.

19

#### 20 *Sliding windows of synonymous divergence*

21 To address the issue of possible recombination we plot  $d_S$  between SARS-CoV-2, GD410721,  
22 and RaTG13 and the ratio of  $d_S(\text{SARS-CoV-2, GD410721})$  to  $d_S(\text{SARS-CoV-2, RaTG13})$  in 300  
23 bp sliding windows along the genome. Notice that we truncate the estimate of  $d_S$  at 3.0.  
24 Differences between estimates larger than 2.0 should not be interpreted strongly, as these  
25 estimates have high variance and likely will be quite sensitive to the specifics of the model  
26 assumptions.

1 We find that  $d_s(\text{SARS-CoV-2, GD410721})$  approximately equals  $d_s(\text{GD410721, RaTG13})$   
2 and is larger than  $d_s(\text{SARS-CoV-2, RaTG13})$  in almost the entire genome showing that in these  
3 parts of the genome GD410721 is a proper outgroup to (SARS-CoV-2, RaTG13) assuming a  
4 constant molecular clock. One noticeable exception from this is the RBD region of the *S* gene.  
5 In this region the divergence between SARS-CoV-2 and GD410721 is substantially lower than  
6 between GD410721 and RaTG13 (Fig. 4a,4c). The same region also has much smaller  
7 divergence between SARS-CoV-2 and GD410721 than between SARS-CoV-2 and RaTG13  
8 (Fig. 4a,4c). The pattern is quite different than that observed in the rest of the genome, most  
9 easily seen by considering the ratio of  $d_s(\text{SARS-CoV-2, GD410721})$  to  $d_s(\text{SARS-CoV-2,}$   
10  $\text{RaTG13})$  (Fig. 2b, 2d). In fact, the estimates of  $d_s(\text{SARS-CoV-2, RaTG13})$  are saturated in this  
11 region, even though they are substantially lower than 1 in the rest of the genome. This strongly  
12 suggests a recombination event in the region and provides independent evidence of that  
13 previously reported based on amino acid divergence (e.g.,(Zhang, et al. 2020)).

14 The combined evidences from synonymous divergence and the topological  
15 recombination inference, provide strong support for the recombination hypothesis. However,  
16 these analyses alone do not distinguish between recombination into RaTG13 from an unknown  
17 source as previously hypothesized (Boni, et al. 2020) and recombination between SARS-CoV-2  
18 and GD410721 as proposed as one possible explanation by Lam et al. (Lam, et al. 2020). To  
19 distinguish between these hypotheses we searched for sequences that might be more closely  
20 related, in the RBD region, to RaTG13 than SARS-CoV-2 and we plotted sliding window  
21 similarities across the genome for RaTG13 (Fig. 1c). We observe relatively low sequence  
22 identity between RaTG13 and all three other strains in the *ACE2* contact residue region of the  
23 *spike* protein, which is more consistent with the hypothesis of recombination into RaTG13, as  
24 proposed in (Boni, et al. 2020). Moreover, our BLAST search analyses of RaTG13 in this region  
25 show highest local sequence similarity with GX pangolin virus strains which is the genome-wide  
26 outgroup for the three other sequences (Lam, et al. 2020). This observation is more compatible

1 with the hypothesis of recombination from a virus related to GX pangolin strains, than with  
2 recombination between SARS-CoV-2 and GD410721.

3         Unfortunately, because of the high level of synonymous divergence to the nearest  
4 outgroup, tree estimation in small windows is extremely labile in this region. In fact, synonymous  
5 divergence appears fully saturated in the comparison with GX\_P1E, eliminating the possibility to  
6 infer meaningful trees based on synonymous divergence. However, we can use the overall  
7 maximum likelihood tree using both synonymous and nonsynonymous mutations (Fig. 2d). The  
8 ML tree using sequence from the *ACE2* contact residue region supports the clustering of SARS-  
9 CoV-2 and GD410721, but with unusual long external branches for all strains except SARS-  
10 CoV-2, possibly reflecting smaller recombination regions within the *ACE2* contact residue region.

11

#### 12 *Weakly deleterious mutations and clock calibrations*

13 The use of synonymous mutations provides an opportunity to calibrate the molecular clock  
14 without relying on amino acid changing mutations that are more likely to be affected by selection.  
15 The rate of substitution of weakly and slightly deleterious mutations is highly dependent on  
16 ecological factors and the effective population size. Weakly deleterious mutations are more  
17 likely to be observed over small time scales than over long time scales, as they are unlikely to  
18 persist in the population for a long time and go to fixation. This will lead to a decreasing  $d_N/d_S$   
19 ratio for longer evolutionary lineages. Furthermore, changes in effective population size will  
20 translate into changes in the rate of substitution of slightly deleterious mutations. Finally,  
21 changes in ecology (such as host shifts, host immune changes, changes in cell surface receptor,  
22 etc.) can lead to changes in the rate of amino acid substitution. For all of these reasons, the use  
23 of synonymous mutations, which are less likely to be the subject of selection than  
24 nonsynonymous mutations, are preferred in molecular clock calculations. For many viruses, the  
25 use of synonymous mutations to calibrate divergence times is not possible, as synonymous  
26 sites are fully saturated even at short divergence times. However, for the comparisons between



1 SARS-CoV-2 and RaTG13, and SARS-CoV-2 and RmYN02, synonymous sites are not  
2 saturated and can be used for calibration. We find an estimate of  $\omega = 0.0391$  between SARS-  
3 CoV-2 and RaTG13, excluding just the small RDB region showing a recombination signal in  
4 SARS-CoV-2 (Supplementary Table 5, coordinates: 22851-23094). Using 1000 parametric  
5 simulations under the estimated values and the F3x4 codon model, we find that the estimate is  
6 approximately unbiased ( $\hat{\omega} = 0.0398$ , S.E.M.= 0.0001) and with standard deviation 0.0033,  
7 providing an approximate 95% confidence interval of (0.0332, 0.0464). Also, using 59 human  
8 strains of SARS-CoV-2 from Genbank and National Microbiology Data Center (See Methods)  
9 we obtain an estimate of  $\omega = 0.5604$  using the F3x4 model in codeml. Notice that there is a 14-  
10 fold difference in  $d_N/d_S$  ratio between these estimates. Assuming very little of this difference is  
11 caused by positive selection, this suggests that the vast majority of mutations currently  
12 segregating in the SARS-CoV-2 are slightly or weakly deleterious for the virus.

13

#### 14 *Dating of divergence between Bat viruses and SARS-CoV-2*

15 To calibrate the clock we use the estimate provided by ([http://virological.org/t/phylogenetic-  
16 analysis-of-sars-cov-2-update-2020-03-06/420](http://virological.org/t/phylogenetic-analysis-of-sars-cov-2-update-2020-03-06/420)) of  $\mu = 1.04 \times 10^{-3}$  substitutions/site/year (95% CI:  
17  $0.71 \times 10^{-3}$ ,  $1.40 \times 10^{-3}$ ). The synonymous specific mutation rate can be found from this as  
18  $d_S/\text{year} = \mu_S = \mu/(pS + \omega pN)$ , where  $\omega$  is the  $d_N/d_S$  ratio, and  $pN$  and  $pS$  are the proportions of  
19 nonsynonymous and synonymous sites, respectively. The estimate of the total divergence on  
20 the two lineages is then  $\hat{t} = dS (pS + \omega pN)/\mu$ . Inserting the numbers from Table 3 for the  
21 divergence between SARS-CoV-2 and RaTG13 and RmYN02 ,respectively, we find a total  
22 divergence of 96.92 years and 74.05 years respectively. Taking into account that RaTG13 was  
23 isolated July 2013, we find an estimated tMRCA between that strain and SARS-CoV-2 of  
24  $\hat{t} = (96.92 + 6.5)/2 = 51.71$  years. Similarly, we find an estimate of divergence between SARS-  
25 CoV-2 and RmYN02 of  $\hat{t} = 74.05/2 = 37.02$  years, assuming approximately equal sampling



1 times. The estimate for SARS-CoV-2 and RaTG13 is compatible with the values obtained using  
2 different methods for dating (Boni, et al. 2020). The variance in the estimate in  $d_S$  is small and  
3 the uncertainty is mostly dominated by the uncertainty in the estimate of the mutation rate. We  
4 estimate the S.D. in  $\hat{t}$  using 1000 parametric simulations, using the ML estimates of all  
5 parameters, for both RaTG13 vs. SARS-CoV-2 and for RmYN02 vs. SARS-CoV-2, and for each  
6 simulated data also simulating values of  $\mu$  and  $\omega$  from normal distributions with mean  $1.04 \times 10^{-3}$   
7 and S.D.  $0.18 \times 10^{-3}$ , and mean 0.5604 and S.D. 0.1122, respectively. We subject each  
8 simulated data set to the same inference procedure as done on the real data. Our estimate of  
9 the S.D. in the estimate is 11.8 for RaTG13 vs. SARS-CoV-2 and 9.41 for RmYN02 vs. SARS-  
10 CoV-2, providing an approximate 95% confidence interval of (28.11, 75.31) and (18.19, 55.85),  
11 respectively. For RaTG13, if including all sites, except the 244-bp in the RBD of the S gene  
12 (Supplementary Table 5), the estimate is 55.02 years with an approx. 95% C.I. of (29.4, 80.7).  
13 As more SARS-CoV-2 sequences are being obtained, providing more precise estimates of the  
14 mutation rate, this confidence interval will become narrower. However, we warn that the  
15 estimate is based on a molecular clock assumption and that violations of this assumption  
16 eventually will become a more likely source of error than the statistical uncertainty quantified in  
17 the calculation of the confidence intervals. We also note that, so far, we have assumed no  
18 variation in the mutation rate among synonymous sites. However, just from the analysis of the  
19 300 bp windows, it is clear that is not true. The variance in the estimate of  $d_S$  among 300 bp  
20 windows from the RaTG13-SARS-CoV-2 comparison is approximately 0.0113. In contrast, in  
21 the simulated data assuming constant mutation rate, the variance is approximately 0.0034,  
22 suggesting substantial variation in the synonymous mutation rate along the length of the  
23 genome. Alternatively, this might be explained by undetected recombination in the evolutionary  
24 history since the divergence of the strains.

25

26 **Discussion**

1 The highly skewed distribution of nucleotide frequencies in synonymous sites in SARS-CoV-2  
2 (Kandeel, et al. 2020), along with high divergence, complicates the estimation of synonymous  
3 divergence in SARS-CoV-2 and related viruses. In particular, in the third codon position the  
4 nucleotide frequency of T is 43.5% while it is just 15.7% for C. This resulting codon usage is not  
5 optimized for mammalian cells (e.g, (Chamary, et al. 2006)). A possible explanation is a strong  
6 mutational bias caused by Apolipoprotein B mRNA-editing enzymes (APOBECs) which can  
7 cause Cytosine-to-Uracil changes (Giorgio, et al. 2020).

8 A consequence of the skewed nucleotide frequencies is a high degree of homoplasy in  
9 synonymous sites that challenges estimates of  $d_S$ . We here evaluated estimators of  $d_S$  in 300 bp  
10 sliding windows and found that a bias-corrected version of the maximum likelihood estimator  
11 tended to perform best for values of  $d_S < 2$ . We used this estimator to investigate the  
12 relationship between SARS-CoV-2 and related viruses in sliding windows. We show that  
13 synonymous mutations show shorter divergence to pangolin viruses, than the otherwise most  
14 closely related bat virus, RaTG13, in part of the receptor-binding domain of the *spike* protein.  
15 This strongly suggests that the previously reported amino acid similarity between pangolin  
16 viruses and SARS-CoV-2 is not due to convergent evolution, but more likely is due to  
17 recombination. In the recombination analysis, we identified recombination from pangolin strains  
18 into SARS-CoV-2, which provides further support for the recombination hypothesis. However,  
19 we also find that the synonymous divergence between SARS-CoV-2 and pangolin viruses in this  
20 region is relatively high, which is not consistent with a recent recombination between the two. It  
21 instead suggests that the recombination was into RaTG13 from an unknown strain, rather than  
22 between pangolin viruses and SARS-CoV-2, as proposed in (Boni, et al. 2020). The alternative  
23 explanation of recombination into SARS-CoV-2 from the pangolin virus, would require the  
24 additional assumption of a mutational hotspot to account for the high level of divergence in the  
25 region between SARS-CoV-2 and the donor pangolin viral genome. To fully distinguish between  
26 these hypotheses, additional strains would have to be discovered that either are candidates for

1 introgression into RaTG13 or can break up the lineage in the phylogenetic tree between  
2 pangolin viruses and RaTG13.

3         The fact that synonymous divergence to the outgroups, RaTG13 and RmYN02, is not  
4 fully saturated, provides an opportunity for a number of different analyses. First, we can date the  
5 time of the divergence between the bat viruses and SARS-CoV-2 using synonymous mutations  
6 alone. In doing so, we find estimates of 51.71 years (95% C.I., 28.11-75.31) and 37.02 years  
7 (95% C.I., 18.19-55.85), respectively. Most of the uncertainty in these estimates comes from  
8 uncertainty in the estimate of the mutation rate reported for SARS-CoV-2. As more data is being  
9 produced for SARS-CoV-2, the estimate should become more precise and the confidence  
10 interval significantly narrowed. We note that the mutation rate we use here are estimated based  
11 on the entire genome, which may differ from that in non-recombination regions. To address this  
12 problem, we downloaded all the SARS-CoV-2 sequences that are available until 2020-08-17  
13 from GISAID, and obtained an estimate of 1:0.81 for the ratio of mutation rates in the  
14 recombination and non-recombination regions, using the "GTRGAMMA" model implemented in  
15 the RAxML (Stamatakis 2014). Given the length ratio between the two partitions is 1:4, the  
16 difference between the partitions will cause a slight overestimate of the mutation rate by ~5%,  
17 which is relatively small compared to the confidence intervals and the potential for other  
18 unknown sources of uncertainty. However, we warn that a residual cause of unmodeled  
19 statistical uncertainty is deviations from the molecular clock. Variation in the molecular clock  
20 could be modeled statistically (see e.g., (Drummond, et al. 2006) and (Lartillot, et al. 2016)), but  
21 the fact that synonymous mutations are mostly saturated for more divergent viruses that would  
22 be needed to train such models, is a challenge to such efforts. On the positive side, we note that  
23 the estimates of  $d_s$  given in Table 3 in general are highly compatible with a constant molecular  
24 clock. Boni et al. (Boni et al. 2020) obtained divergence time estimates similar to ours using a  
25 very different approach based on including more divergent sequences and applying a relaxed  
26 molecular clock. We see the two approaches as being complimentary. In the traditional relaxed

1 molecular clock approach more divergent sequences are needed that may introduce more  
2 uncertainty due to various idiosyncrasies such as alignment errors. Furthermore, the relaxed  
3 molecular clock uses both synonymous and non-synonymous mutations and is, therefore, more  
4 susceptible to the effects of selection. Our approach allows us to focus on just the relevant in-  
5 group species and to use only synonymous mutations. The disadvantage is that we cannot  
6 accommodate a relaxed molecular clock. However, the fact that both approaches provide  
7 similar estimates is reassuring and suggests that neither idiosyncrasies of divergent sequences,  
8 natural selection, or deviations from a molecular clock has led to grossly misleading conclusions

9       Another advantage of estimation of synonymous and nonsynonymous rates in the  
10 outgroup lineage, is that it can provide estimates of the mutational load of the current pandemic.  
11 The  $d_N/d_S$  ratio is almost 14 times larger in the circulating SARS-CoV-2 strains than in the  
12 outgroup lineage. While some of this difference could possibly be explained by positive  
13 selection acting at a higher rate after zoonotic transfer, it is perhaps more likely that a  
14 substantial proportion of segregating nonsynonymous mutations are deleterious, suggesting a  
15 very high and increasing mutation load in circulating SARS-CoV-2 strains.

16

## 17 **Acknowledgements**

18 We are grateful to Dr. E.C Holmes for providing the genome sequence of RmYN02. We thank  
19 Dr. Sergei L Kosakovsky Pond for providing aligned sequences of SARS-CoV-2. We also thank  
20 Dr. Adi Stern for discussion. The research was funded by Koret-UC Berkeley-Tel Aviv University  
21 Initiative in Computational Biology and Bioinformatics to RN.

## 22 **Data Availability**

23 The pangolin virus sequences, GD410721 and GX\_P1E, were downloaded from GISAID with  
24 accession numbers EPI\_ISL\_410721 and EPI\_ISL\_410539, respectively, and RmYN02  
25 sequence was provided by E. C. Holmes. All other sequences analyzed in this study were  
26 downloaded from either NCBI Genbank or National Microbiology Data Cente (NMDC). The

1 accession codes for non-human sequences can be found in Supplementary Table 2 and the  
2 accession codes for human sequences can be found in Supplementary Table 3.

3

#### 4 **Reference**

- 5 Altschul SF, Gish W, Miller W, Myers EW, Lipman DJ. 1990. Basic local alignment search tool. *J*  
6 *Mol Biol* 215:403-410.
- 7 Boni MF, Lemey P, Jiang X, Lam TT, Perry BW, Castoe TA, Rambaut A, Robertson DL. 2020.  
8 Evolutionary origins of the SARS-CoV-2 sarbecovirus lineage responsible for the COVID-19  
9 pandemic. *Nat Microbiol*. <https://doi.org/10.1038/s41564-020-0771-4>
- 10 Boni MF, Posada D, Feldman MW. 2007. An exact nonparametric method for inferring mosaic  
11 structure in sequence triplets. *Genetics* 176:1035-1047.
- 12 Chamary JV, Parmley JL, Hurst LD. 2006. Hearing silence: non-neutral evolution at  
13 synonymous sites in mammals. *Nat Rev Genet* 7:98-108.
- 14 Drummond AJ, Ho SY, Phillips MJ, Rambaut A. 2006. Relaxed phylogenetics and dating with  
15 confidence. *PLoS Biol* 4:e88.
- 16 Felsenstein J. 2009. PHYLIP (Phylogeny Inference Package) version 3.7a. Distributed by the  
17 author. Department of Genome Sciences, University of Washington, Seattle.
- 18 Forni D, Cagliani R, Clerici M, Sironi M. 2017. Molecular Evolution of Human Coronavirus  
19 Genomes. *Trends Microbiol* 25:35-48.
- 20 Gibbs MJ, Armstrong JS, Gibbs AJ. 2000. Sister-scanning: a Monte Carlo procedure for  
21 assessing signals in recombinant sequences. *Bioinformatics* 16:573-582.
- 22 Di Giorgio S, Martignano F, Torcia MG, Mattiuz G, Conticello SG. 2020. Evidence for host-  
23 dependent RNA editing in the transcriptome of SARS-CoV-2. *Sci Adv* 6:eabb5813.
- 24 Goldman N, Yang Z. 1994. A codon-based model of nucleotide substitution for protein-coding  
25 DNA sequences. *Mol Biol Evol* 11:725-736.
- 26 Hu D, Zhu C, Ai L, He T, Wang Y, Ye F, Yang L, Ding C, Zhu X, Lv R, et al. 2018. Genomic  
27 characterization and infectivity of a novel SARS-like coronavirus in Chinese bats. *Emerg*  
28 *Microbes Infect* 7:154.

- 1 Kandeel M, Ibrahim A, Fayez M, Al-Nazawi M. 2020. From SARS and MERS CoVs to SARS-  
2 CoV-2: Moving toward more biased codon usage in viral structural and nonstructural genes. *J*  
3 *Med Virol*.
- 4 Katoh K, Standley DM. 2013. MAFFT multiple sequence alignment software version 7:  
5 improvements in performance and usability. *Mol Biol Evol* 30:772-780.
- 6 Lam TT, Shum MH, Zhu HC, Tong YG, Ni XB, Liao YS, Wei W, Cheung WY, Li WJ, Li LF, et al.  
7 2020. Identifying SARS-CoV-2 related coronaviruses in Malayan pangolins. *Nature*.
- 8 Lartillot N, Phillips MJ, Ronquist F. 2016. A mixed relaxed clock model. *Philos Trans R Soc*  
9 *Lond B Biol Sci* 371.
- 10 Li Q, Guan X, Wu P, Wang X, Zhou L, Tong Y, Ren R, Leung KSM, Lau EHY, Wong JY, et al.  
11 2020. Early Transmission Dynamics in Wuhan, China, of Novel Coronavirus-Infected  
12 Pneumonia. *N Engl J Med* 382:1199-1207.
- 13 Li X, Giorgi EE, Marichannegowda MH, Foley B, Xiao C, Kong X-P, Chen Y, Gnanakaran S,  
14 Korber B, Gao F. 2020. Emergence of SARS-CoV-2 through recombination and strong purifying  
15 selection. *Sci. Adv.* 6:eabb9153.
- 16 Loytynoja A. 2014. Phylogeny-aware alignment with PRANK. *Methods Mol Biol* 1079:155-170.
- 17 Lu R, Zhao X, Li J, Niu P, Yang B, Wu H, Wang W, Song H, Huang B, Zhu N, et al. 2020.  
18 Genomic characterisation and epidemiology of 2019 novel coronavirus: implications for virus  
19 origins and receptor binding. *Lancet* 395:565-574.
- 20 Martin D, Rybicki E. 2000. RDP: detection of recombination amongst aligned sequences.  
21 *Bioinformatics* 16:562-563.
- 22 Martin DP, Murrell B, Golden M, Khoosal A, Muhire B. 2015. RDP4: Detection and analysis of  
23 recombination patterns in virus genomes. *Virus Evol* 1:vev003.
- 24 Muse SV, Gaut BS. 1994. A likelihood approach for comparing synonymous and  
25 nonsynonymous nucleotide substitution rates, with application to the chloroplast genome. *Mol*  
26 *Biol Evol* 11:715-724.
- 27 Nguyen LT, Schmidt HA, von Haeseler A, Minh BQ. 2015. IQ-TREE: a fast and effective  
28 stochastic algorithm for estimating maximum-likelihood phylogenies. *Mol Biol Evol* 32:268-274.
- 29 Padidam M, Sawyer S, Fauquet CM. 1999. Possible emergence of new geminiviruses by  
30 frequent recombination. *Virology* 265:218-225.

- 1 Patiño-Galindo JÁ, Filip I, AlQuraishi M, Rabadan R. 2020. Recombination and lineage-specific  
2 mutations led to the emergence of SARS-CoV-2. bioRxiv DOI: 10.1101/2020.02.10.942748.
- 3 Posada D, Crandall KA. 2001. Evaluation of methods for detecting recombination from DNA  
4 sequences: computer simulations. *Proc Natl Acad Sci U S A* 98:13757-13762.
- 5 Salminen MO, Carr JK, Burke DS, McCutchan FE. 1995. Identification of breakpoints in  
6 intergenotypic recombinants of HIV type 1 by bootscanning. *AIDS Res Hum Retroviruses*  
7 11:1423-1425.
- 8 Smith JM. 1992. Analyzing the mosaic structure of genes. *J Mol Evol* 34:126-129.
- 9 Valitutto MT, Aung O, Tun KYN, Vodzak ME, Zimmerman D, Yu JH, Win YT, Maw MT, Thein  
10 WZ, Win HH, et al. 2020. Detection of novel coronaviruses in bats in Myanmar. *PLoS One*  
11 15:e0230802.
- 12 Wan Y, Shang J, Graham R, Baric RS, Li F. 2020. Receptor Recognition by the Novel  
13 Coronavirus from Wuhan: an Analysis Based on Decade-Long Structural Studies of SARS  
14 Coronavirus. *J Virol* 94.
- 15 Wu F, Zhao S, Yu B, Chen YM, Wang W, Song ZG, Hu Y, Tao ZW, Tian JH, Pei YY, et al. 2020.  
16 A new coronavirus associated with human respiratory disease in China. *Nature* 579:265-269.
- 17 Xiao K, Zhai J, Feng Y, Zhou N, Zhang X, Zou JJ, Li N, Guo Y, Li X, Shen X, et al. 2020.  
18 Isolation of SARS-CoV-2-related coronavirus from Malayan pangolins. *Nature* 583:286-289.
- 19 Yang Z. 2007. PAML 4: phylogenetic analysis by maximum likelihood. *Mol Biol Evol* 24:1586-  
20 1591.
- 21 Yang Z, Nielsen R. 2000. Estimating synonymous and nonsynonymous substitution rates under  
22 realistic evolutionary models. *Mol Biol Evol* 17:32-43.
- 23 Yang Z, Nielsen R, Goldman N, Pedersen AM. 2000. Codon-substitution models for  
24 heterogeneous selection pressure at amino acid sites. *Genetics* 155:431-449.
- 25 Zhang T, Wu Q, Zhang Z. 2020. Probable Pangolin Origin of SARS-CoV-2 Associated with the  
26 COVID-19 Outbreak. *Curr Biol* 30:1346-1351 e1342.
- 27 Zhang YZ, Holmes EC. 2020. A Genomic Perspective on the Origin and Emergence of SARS-  
28 CoV-2. *Cell* 181:223-227.

1 Zhou H, Chen X, Hu T, Li J, Song H, Liu Y, Wang P, Liu D, Yang J, Holmes EC, et al. 2020. A  
2 Novel Bat Coronavirus Closely Related to SARS-CoV-2 Contains Natural Insertions at the  
3 S1/S2 Cleavage Site of the Spike Protein. *Curr Biol* 30:2196-2203 e2193.

4 Zhou P, Yang XL, Wang XG, Hu B, Zhang L, Zhang W, Si HR, Zhu Y, Li B, Huang CL, et al.  
5 2020. A pneumonia outbreak associated with a new coronavirus of probable bat origin. *Nature*  
6 579:270-273.

7

8

9



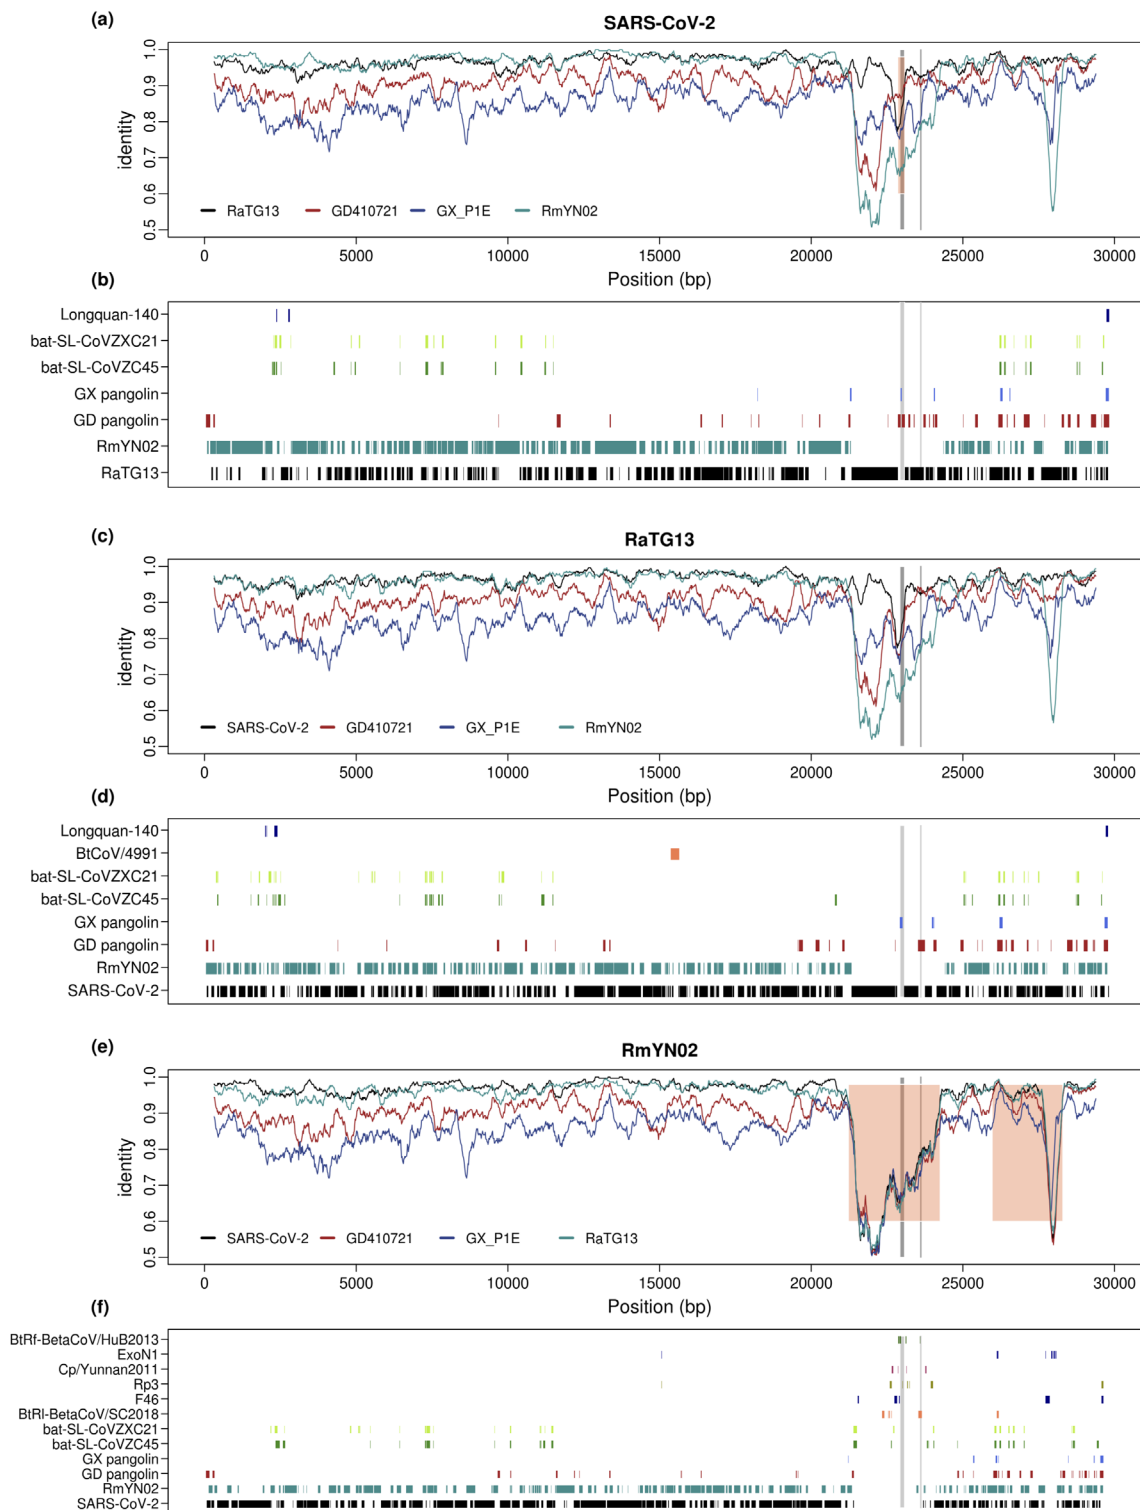

**Figure 1. Genome-wide identity plot and top blast hits for SARS-CoV-2, RaTG13 and RmYN02.** (a) 300 bp sliding-windows of nucleotide identity between SARS-CoV-2 and the four most closely related viral strains, RmYN02, RaTG13, GD410721 and GX\_P1E. Orange shading

marks the recombinant region in SARS-CoV-2 inferred by 3SEQ (details in Supplementary Table 5). (b) the plot lists all the viral strains that are the unique best BLAST hit in at least three 100-bp windows, when blasting with SARS-CoV-2, with the regions where each strain is the top blast hit marked. (b) and (c). Figures for RaTG13 (c, d) and RmYN02 (e, f) generated in the same way as for SARS-CoV-2 in (a) and (b). The *ACE2* contact residues of RBD region (left) and the furin sites (right) of the S protein are marked in both plots with grey lines.

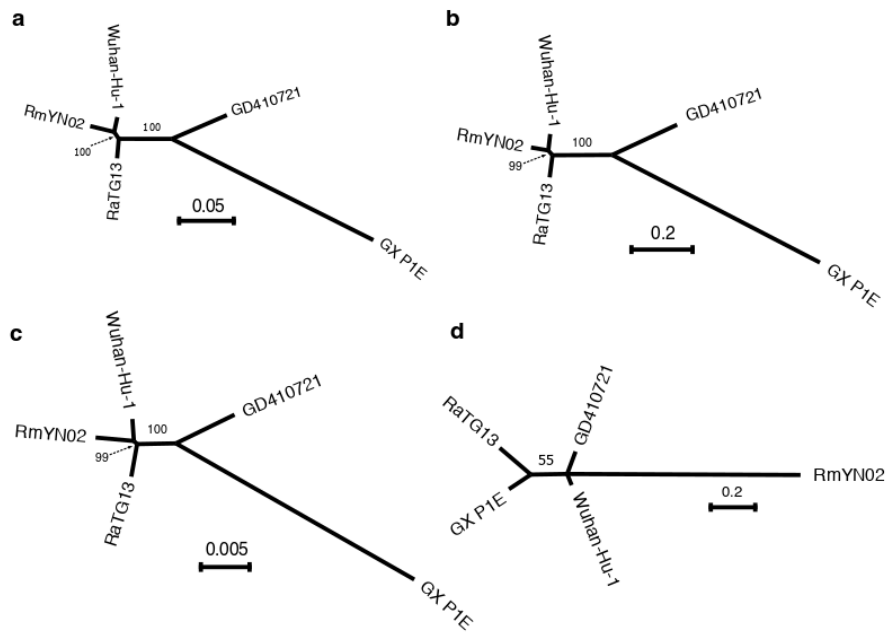

**Figure 2. Unrooted phylogenies of the virus strains.** (a) Maximum-likelihood tree in genomic regions with recombination tracts removed; (b) Neighbor-joining tree using synonymous mutation ( $d_s$ ) distance in genomic regions with recombination tracts removed; (c) Neighbor-joining tree using non-synonymous mutation ( $d_N$ ) distances in genomic regions with recombination tracts removed; (d) The maximum-likelihoods tree at the receptor-binding domain ACE2 contact residues (51 amino acids) region. The bootstrap values are based on 1,000 replicates. The associated distance matrix for (b) and (c) can be found in Table 3.

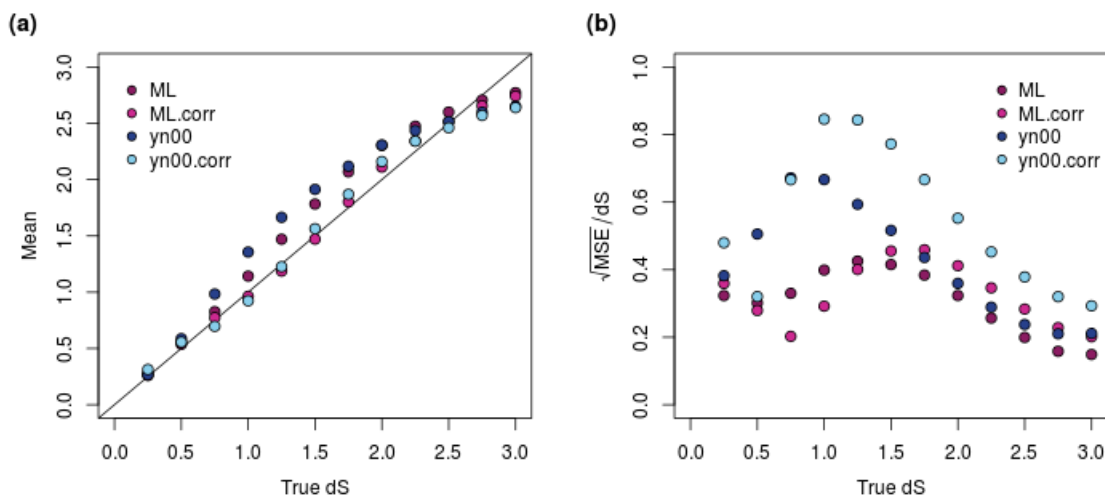

**Figure 3. Bias correction for  $d_S$  estimate in 300-bp windows.** (a) The mean of  $d_S$  estimates using different methods; ML.corr and yn00.corr are the bias corrected versions of the ML and yn00 methods, respectively. (b) Errors in  $d_S$  estimates as measured using the ratio of square root of mean squared error (MSE) to true  $d_S$ . All the estimates are based on 10,000 simulations. ML: maximum-likelihood estimates using the f3x4 model in codeml; ML.corr, maximum-likelihood estimates with bias correction; yn00, count-based estimates in (Yang and Nielsen 2000); yn00.corr, yn00 estimates with bias correction. All  $d_S$  estimates are truncated at 3, explaining the reduction in MSE with increasing values of  $d_S$  as  $d_S$  approaches 3.

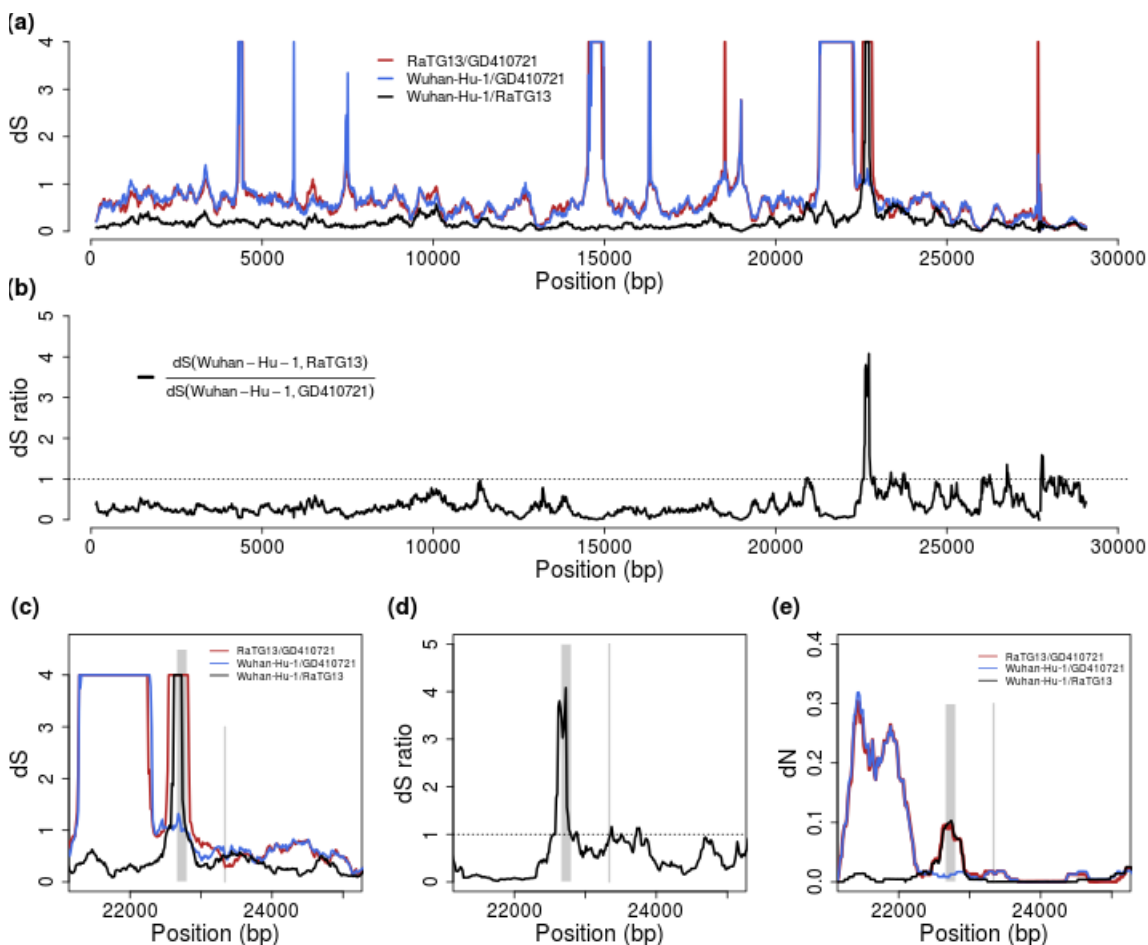

**Figure 4.  $d_S$  and  $d_N$  estimates across the virus genome.** (a) Pairwise  $d_S$  estimates in 300-bp sliding windows for RaTG13, GD410721 and Wuhan-Hu-1, the estimates are truncated at 4. (b)  $d_S$  ratio of  $d_S(\text{Wuhan-Hu-1, RaTG13})$  to  $d_S(\text{Wuhan-Hu-1, GD410721})$ . (c) and (d) are the zoom-in plot for  $d_S$  and  $d_S$ -ratio at the *spike* (S) protein region. The receptor-binding domain contact residues (left) and furin site regions (right) are marked with grey lines. (e) the pairwise  $d_N$  estimates in 300-bp sliding windows in the S protein for these strains. The  $d_S$  values are truncated at 4 in the plots.

**Table 1.** Genome-wide nucleotide composition at the third position of the codons in the viral strains. The nucleotide compositions at the first and second positions can be found in Supplementary table 1.

| Accession  | T      | C      | A      | G      |
|------------|--------|--------|--------|--------|
| GD410721   | 42.71% | 16.17% | 28.55% | 12.57% |
| GX_P1E     | 42.52% | 16.40% | 28.27% | 12.81% |
| RaTG13     | 43.57% | 15.74% | 27.98% | 12.71% |
| RmYN02     | 43.31% | 15.90% | 27.98% | 12.81% |
| Wuhan-Hu-1 | 43.49% | 15.73% | 28.16% | 12.62% |

**Table 2.** Whole genome  $d_N$  and  $d_S$  estimates among the viral strains. The  $d_S$  estimates are shaded in green, and the  $d_N$  estimates are in orange shade. The 95% confidence intervals, calculated based on 1,000 bootstrap replicates, are included in the brackets for each estimates.

|            | GD410721                  | GX_P1E                    | RaTG13                    | RmYN02                    | Wuhan-Hu-1                |
|------------|---------------------------|---------------------------|---------------------------|---------------------------|---------------------------|
| GD410721   |                           | 0.0372<br>(0.0341-0.0403) | 0.0171<br>(0.0152-0.0190) | 0.0293<br>(0.0266-0.0320) | 0.0160<br>(0.0142-0.0178) |
| GX_P1E     | 0.9883<br>(0.9338-1.0428) |                           | 0.0347<br>(0.0318-0.0376) | 0.0485<br>(0.0450-0.0520) | 0.0342<br>(0.0314-0.0370) |
| RaTG13     | 0.5392<br>(0.5105-0.5679) | 1.0156<br>(0.9608-1.0704) |                           | 0.0235<br>(0.0210-0.0260) | 0.0065<br>(0.0053-0.0077) |
| RmYN02     | 0.6001<br>(0.5681-0.6321) | 1.0757<br>(1.0166-1.1348) | 0.2438<br>(0.2285-0.2591) |                           | 0.0220<br>(0.0195-0.0245) |
| Wuhan-Hu-1 | 0.5425<br>(0.5131-0.5719) | 0.9973<br>(0.9434-1.0512) | 0.1604<br>(0.1491-0.1717) | 0.2043<br>(0.1901-0.2185) |                           |

**Table 3.** Genome-wide  $d_N$  and  $d_S$  estimates after removing recombination regions inferred by 3SEQ . The  $d_S$  estimates are shaded in green, and the  $d_N$  estimates are in orange shade. The coordinates relative to the Wuhan-Hu-1 genome of the masked region can be found in the method section. The 95% confidence intervals, calculated based on 1,000 bootstrap replicates, are included in the brackets for each estimates.

|            | GD410721                  | GX_P1E                    | RaTG13                    | RmYN02                    | Wuhan-Hu-1                |
|------------|---------------------------|---------------------------|---------------------------|---------------------------|---------------------------|
| GD410721   |                           | 0.0348<br>(0.0317-0.0379) | 0.0138<br>(0.0120-0.0156) | 0.0152<br>(0.0133-0.0171) | 0.0135<br>(0.0117-0.0153) |
| GX_P1E     | 0.9974<br>(0.9381-1.0567) |                           | 0.0357<br>(0.0325-0.0389) | 0.0361<br>(0.0329-0.0393) | 0.0349<br>(0.0318-0.0380) |
| RaTG13     | 0.4962<br>(0.4669-0.5255) | 1.0366<br>(0.9737-1.0995) |                           | 0.0079<br>(0.0066-0.0092) | 0.0060<br>(0.0048-0.0071) |
| RmYN02     | 0.5070<br>(0.4773-0.5366) | 1.0333<br>(0.9699-1.0967) | 0.1522<br>(0.1395-0.1649) |                           | 0.0062<br>(0.0050-0.0074) |
| Wuhan-Hu-1 | 0.5095<br>(0.4794-0.5396) | 1.0304<br>(0.9669-1.0939) | 0.1462<br>(0.1340-0.1584) | 0.1117<br>(0.1019-0.1215) |                           |
